# Supplementary material
Source: PubMed Central journal article supplement (PMC5482786)
Supplement: NIHMS867739-supplement-Supplemental_Digital_Content_2.pdf [file NIHMS867739-supplement-Supplemental_Digital_Content_2.pdf]

**Appendix 2. Oxycodone Utilization After Discharge and Satisfaction With Pain Regimen, Stratified by Type and Timing Of Cesarean Delivery**

| Outcomes                                              | Median [IQR], or n (%)           |                                 |                                               |                                    |
|-------------------------------------------------------|----------------------------------|---------------------------------|-----------------------------------------------|------------------------------------|
|                                                       | Primary cesarean delivery (n=35) | Repeat cesarean delivery (n=15) | Planned <sup>a</sup> cesarean delivery (n=19) | Unplanned cesarean delivery (n=31) |
| <b>Number of oxycodone tablets chosen,</b>            | 20.0 [15.0, 25.0] <sup>b</sup>   | 20.0 [10.0, 30.0] <sup>c</sup>  | 20.0 [10.0, 23.0] <sup>d</sup>                | 20.0 [20.0, 30.0] <sup>e</sup>     |
| <b>Number of oxycodone tablets used</b>               | 16.0 [8.0, 25.0]                 | 15.0 [3.0, 30.0]                | 11.0 [3.0, 23.0]                              | 16.0 [8.0, 31.0]                   |
| <b>Number of oxycodone tablets remaining</b>          | 4.0 [0.0,11.0]                   | 0.0 [0.0, 8.0]                  | 1.0 [0.0, 9.0]                                | 4.0 [0.0, 8.0]                     |
| <b>Need for oxycodone refills</b>                     | 2 (5.7)                          | 2 (13.3)                        | 0 (0.0)                                       | 4 (12.9)                           |
| <b>Satisfied with outpatient pain management</b>      | 18 (51.4)                        | 8 (53.3)                        | 9 (47.4)                                      | 17 (54.8)                          |
| <b>Very satisfied with outpatient pain management</b> | 13 (37.1)                        | 6 (40.0)                        | 8 (42.1)                                      | 11 (35.5)                          |

<sup>a</sup> Planned cesarean delivery refers to a scheduled cesarean delivery. Unplanned cesarean delivery refers to an intrapartum cesarean delivery.

<sup>b</sup> For 5 patients, the number of tablets prescribed was different from the number chosen, such that the overall median [IQR] number of tablets dispensed was 23.0 [20.0, 35.0].

<sup>c</sup> For 1 patient, the number of tablets prescribed was different from the number chosen, such that the overall median [IQR] number of tablets dispensed was 20.0 [10.0, 30.0].

<sup>d</sup> For 4 patients, the number of tablets prescribed was different from the number chosen, such that the overall median [IQR] number of tablets dispensed was 20.0 [10.0, 25.0].

<sup>e</sup> For 2 patients, the number of tablets prescribed was different from the number chosen, such that the overall median [IQR] number of tablets dispensed was 25.0 [20.0, 35.0].
